# Supplementary material for: Biomass Modification Using Cationic Surfactant Cetyltrimethylammonium Bromide (CTAB) to Remove Palm-Based Cooking Oil
Source: Hindawi journal article supplement (doi:10.1155/2018/5059791), 2018-12-24

## Supplementary document

The raw data for each parameter are as follows:

### Batch test formula

The adsorption capacity was calculate using the following formula:

$$\text{Adsorption capacity (g/g)} = (S_t - S_o) / S_o$$

The percentage of oil removal will be determined as follows:

$$\text{Oil removal (\%)} = \frac{(m_{oil})}{(m_{oil,o})} 100$$

Where  $m_{oil}$  and  $m_{oil,o}$  are the amount of palm oil extracted from sago hampas (g) and initial amount of palm oil (g) respectively.  $S_t$  is the total mass of absorb sample and  $S_o$  is the initial weight of sample.

### Effect of sorption time

Adsorption capacity (g/g) data

| Time (mins) | Mass of sago hampas before adsorption (g) | Mass of sago hampas after adsorption (g) |         |         | Adsorption capacity (g/g) |         |         | Average (g/g) |
|-------------|-------------------------------------------|------------------------------------------|---------|---------|---------------------------|---------|---------|---------------|
|             |                                           | Trial 1                                  | Trial 2 | Trial 3 | Trial 1                   | Trial 2 | Trial 3 |               |
| 2           | 0.2                                       | 1.752                                    | 1.821   | 1.762   | 7.760                     | 8.105   | 7.810   | 7.892         |
| 5           | 0.2                                       | 1.787                                    | 1.829   | 1.906   | 7.935                     | 8.145   | 8.530   | 8.203         |
| 10          | 0.2                                       | 1.871                                    | 1.943   | 1.844   | 8.355                     | 8.715   | 8.220   | 8.430         |
| 15          | 0.2                                       | 2.013                                    | 2.045   | 2.007   | 9.065                     | 9.225   | 9.035   | 9.108         |
| 30          | 0.2                                       | 2.472                                    | 2.331   | 2.494   | 11.360                    | 10.655  | 11.470  | 11.162        |
| 45          | 0.2                                       | 2.824                                    | 2.722   | 2.976   | 13.120                    | 12.610  | 13.880  | 13.203        |
| 60          | 0.2                                       | 2.769                                    | 2.707   | 2.997   | 12.845                    | 12.535  | 13.985  | 13.122        |

Percentage of oil removal data (%)

| Time (mins) | Mass of sago hampas before adsorption (g) | Mass of sago hampas after adsorption (g) |         |         | Oil removal (%) |         |         | Average (%) |
|-------------|-------------------------------------------|------------------------------------------|---------|---------|-----------------|---------|---------|-------------|
|             |                                           | Trial 1                                  | Trial 2 | Trial 3 | Trial 1         | Trial 2 | Trial 3 |             |
| 2           | 0.2                                       | 1.752                                    | 1.821   | 1.762   | 34.876          | 36.427  | 35.101  | 35.468      |
| 5           | 0.2                                       | 1.787                                    | 1.829   | 1.906   | 35.663          | 36.607  | 38.337  | 36.869      |
| 10          | 0.2                                       | 1.871                                    | 1.943   | 1.844   | 37.551          | 39.169  | 36.944  | 37.888      |
| 15          | 0.2                                       | 2.013                                    | 2.045   | 2.007   | 40.742          | 41.461  | 40.607  | 40.937      |
| 30          | 0.2                                       | 2.472                                    | 2.331   | 2.494   | 51.056          | 47.888  | 51.551  | 50.165      |
| 45          | 0.2                                       | 2.824                                    | 2.722   | 2.976   | 58.966          | 56.674  | 62.382  | 59.341      |
| 60          | 0.2                                       | 2.769                                    | 2.707   | 2.997   | 57.730          | 56.337  | 62.854  | 58.974      |

**Effect of adsorbent dosage**

Adsorption capacity (g/g) data

| Adsorbent dosage (g) | Mass of sago hampas after adsorption (g) |         |         | Adsorption (g/g) |         |         | Average (g/g) |
|----------------------|------------------------------------------|---------|---------|------------------|---------|---------|---------------|
|                      | Trial 1                                  | Trial 2 | Trial 3 | Trial 1          | Trial 2 | Trial 3 |               |
| 0.1                  | 1.584                                    | 1.811   | 1.797   | 14.840           | 17.110  | 16.970  | 16.307        |
| 0.2                  | 2.783                                    | 2.430   | 2.776   | 12.915           | 11.150  | 12.880  | 12.315        |
| 0.3                  | 3.182                                    | 3.267   | 3.151   | 9.607            | 9.890   | 9.503   | 9.667         |
| 0.4                  | 3.447                                    | 3.459   | 3.470   | 7.618            | 7.648   | 7.675   | 7.647         |

### Percentage of oil removal data (%)

| Adsorbent dosage (g) | Mass of sago hampas after adsorption (g) |         |         | Oil removal (%) |         |         | Average (%) |
|----------------------|------------------------------------------|---------|---------|-----------------|---------|---------|-------------|
|                      | Trial 1                                  | Trial 2 | Trial 3 | Trial 1         | Trial 2 | Trial 3 |             |
| 0.1                  | 1.584                                    | 1.811   | 1.797   | 33.348          | 38.449  | 38.135  | 36.644      |
| 0.2                  | 2.783                                    | 2.430   | 2.776   | 58.045          | 56.854  | 57.888  | 50.112      |
| 0.3                  | 3.182                                    | 3.267   | 3.151   | 64.764          | 66.674  | 64.067  | 65.168      |
| 0.4                  | 3.447                                    | 3.459   | 3.470   | 68.472          | 68.742  | 68.989  | 68.734      |

### Effect of pH

#### Adsorption capacity (g/g) data

| pH  | Mass of sago hampas before adsorption (g) | Mass of sago hampas after adsorption (g) |         |         | Adsorption (g/g) |         |         | Average (g/g) |
|-----|-------------------------------------------|------------------------------------------|---------|---------|------------------|---------|---------|---------------|
|     |                                           | Trial 1                                  | Trial 2 | Trial 3 | Trial 1          | Trial 2 | Trial 3 |               |
| 0.5 | 0.2                                       | 2.342                                    | 2.174   | 2.308   | 10.710           | 9.870   | 10.540  | 10.373        |
| 1   | 0.2                                       | 2.479                                    | 2.463   | 2.459   | 11.395           | 11.315  | 11.295  | 11.335        |
| 2   | 0.2                                       | 2.851                                    | 2.829   | 2.847   | 13.255           | 13.145  | 13.235  | 13.212        |
| 4   | 0.2                                       | 2.690                                    | 2.850   | 2.853   | 12.450           | 13.250  | 13.265  | 12.988        |
| 6   | 0.2                                       | 2.618                                    | 2.271   | 2.159   | 12.090           | 10.355  | 9.795   | 10.747        |
| 8   | 0.2                                       | 2.371                                    | 2.131   | 2.256   | 10.855           | 9.655   | 10.280  | 10.263        |
| 10  | 0.2                                       | 2.902                                    | 2.738   | 2.781   | 13.510           | 12.690  | 12.905  | 13.035        |

Percentage of oil removal data (%)

| pH  | Mass of sago hampas before adsorption (g) | Mass of sago hampas after adsorption (g) |         |         | Oil removal (%) |         |         | Average (%) |
|-----|-------------------------------------------|------------------------------------------|---------|---------|-----------------|---------|---------|-------------|
|     |                                           | Trial 1                                  | Trial 2 | Trial 3 | Trial 1         | Trial 2 | Trial 3 |             |
| 0.5 | 0.2                                       | 2.342                                    | 2.174   | 2.308   | 48.135          | 44.360  | 47.371  | 46.622      |
| 1   | 0.2                                       | 2.479                                    | 2.463   | 2.459   | 51.213          | 50.854  | 50.764  | 50.944      |
| 2   | 0.2                                       | 2.851                                    | 2.829   | 2.847   | 59.573          | 59.079  | 59.483  | 59.378      |
| 4   | 0.2                                       | 2.690                                    | 2.850   | 2.853   | 55.955          | 59.551  | 59.618  | 58.375      |
| 6   | 0.2                                       | 2.618                                    | 2.271   | 2.159   | 54.337          | 46.539  | 44.022  | 48.299      |
| 8   | 0.2                                       | 2.371                                    | 2.131   | 2.256   | 48.787          | 43.393  | 46.202  | 46.127      |
| 10  | 0.2                                       | 2.902                                    | 2.738   | 2.781   | 60.719          | 57.034  | 58.000  | 58.584      |

**Effect of unmodified and modified sago hampas**

Adsorption capacity (g/g) data

|                        | Mass of sago hampas after adsorption (g) |         |         | Adsorption capacity (g/g) |         |         | Average (g/g) |
|------------------------|------------------------------------------|---------|---------|---------------------------|---------|---------|---------------|
|                        | Trial 1                                  | Trial 2 | Trial 3 | Trial 1                   | Trial 2 | Trial 3 |               |
| Modified Sago Hampas   | 3.951                                    | 3.995   | 3.982   | 18.755                    | 18.975  | 18.910  | 18.880        |
| Unmodified Sago Hampas | 3.232                                    | 3.307   | 3.149   | 15.160                    | 15.535  | 14.745  | 15.147        |

Percentage of oil removal data (%)

|                        | Mass of sago hampas after adsorption (g) |         |         | Oil removal (%) |         |         | Average (%) |
|------------------------|------------------------------------------|---------|---------|-----------------|---------|---------|-------------|
|                        | Trial 1                                  | Trial 2 | Trial 3 | Trial 1         | Trial 2 | Trial 3 |             |
| Modified Sago Hampas   | 3.951                                    | 3.995   | 3.982   | 84.292          | 85.281  | 84.989  | 84.824      |
| Unmodified Sago Hampas | 3.232                                    | 3.307   | 3.149   | 68.135          | 69.820  | 66.270  | 68.075      |

FTIR spectra of unmodified sago hampas, modified sago hampas and modified sago hampas loaded with oil at optimum conditions

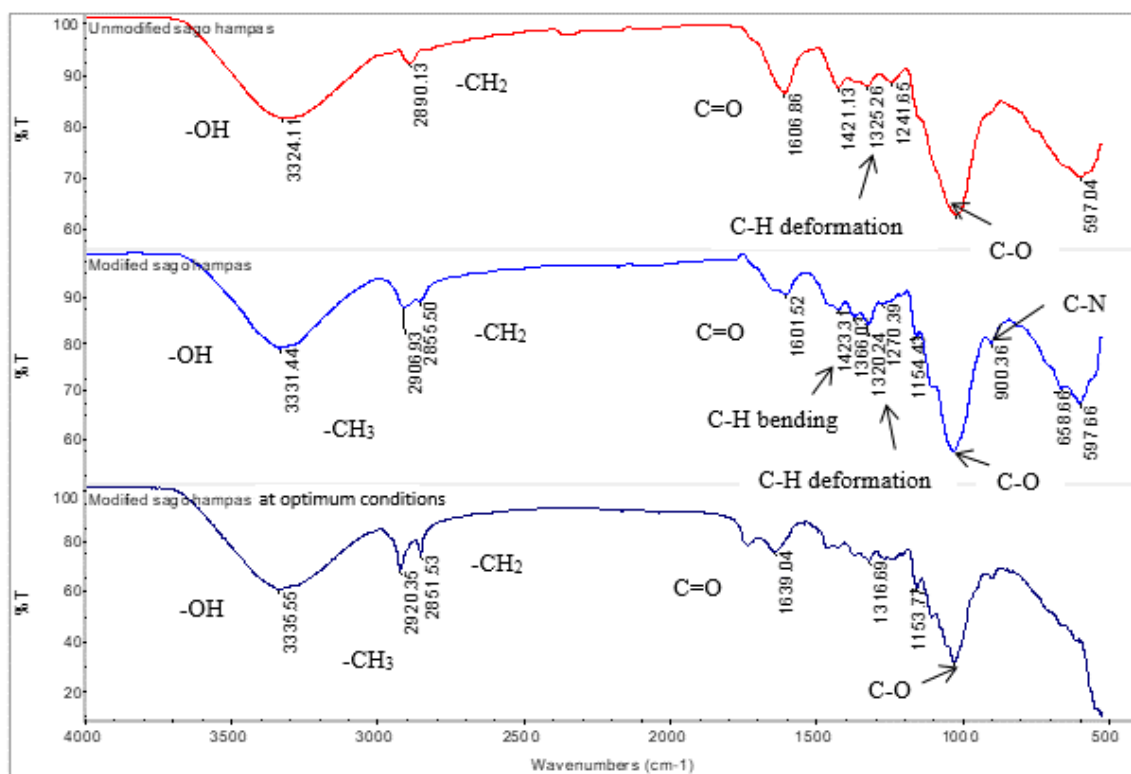

Supplement: f1 [file 5059791.f1.pdf]
